# Supplementary material for: Green synergy: a novel deep eutectic solvent in eco-friendly air-assisted solidified floating drop microextraction for ultrasensitive lead determination
Source: Royal Society of Chemistry journal article supplement (doi:10.1039/d5ay01963j), 2026-01-01
Supplement: d5ay01963j1.pdf [file d5ay01963j1.pdf]

## Green Synergy: A Novel Deep Eutectic Solvent in Eco-Friendly Air-Assisted Solidified Floating Drop Microextraction for Ultrasensitive Lead Determination

Anwar Abduljaleel Mhmood Abodiame <sup>1</sup>, Zainab Abdelmuttaleb Hammood <sup>2</sup>, Isam Mohammed Turki <sup>3</sup>, Ghusoon Jawad Shabaa <sup>4</sup>, Mehdi Hosseini <sup>5</sup>, Ebaa Adnan Azooz <sup>6,7\*</sup>

<sup>1</sup> The Faculty of Pharmacy, Jabir Ibn Hayyan University for Medical and Pharmaceutical Sciences, Najaf, Iraq. <http://orcid.org/0009-0006-1290-4738>.

<sup>2</sup> The Chemistry Department, The Faculty of Education for Women, Kufa University, Najaf, Iraq. <http://orcid.org/0000-0002-5560-101X>.

<sup>3</sup> The Department of Community Health, Technical Institute of Kufa, Al-Furat Al-Awsat Technical University, Iraq. <http://orcid.org/0009-0000-1702-279X>

<sup>4</sup> The College of Medicine, Jabir Ibn Hayyan University for Medical and Pharmaceutical Sciences, Najaf, Iraq. <http://orcid.org/0000-0003-3312-8687>.

<sup>5</sup> Department of Chemistry, Faculty of Basic Sciences, Ayatollah Boroujerdi University, Boroujerd, Iran. <http://orcid.org/0000-0001-5999-5178>

<sup>6</sup> The Chemistry Department, The Gifted Students' School in Najaf, Ministry of Education, Najaf, Iraq.

<sup>7</sup> Radiological Technology Department, College of Medical Technology, The Islamic University, Najaf, Iraq.

\*Corresponding author: [azoozea@iunajaf.edu.iq](mailto:azoozea@iunajaf.edu.iq), <http://orcid.org/0000-0002-4438-8938>

**Table S1. The GFAAS parameters**

| Parameter           | Value      |
|---------------------|------------|
| Wavelength          | 283.5 nm   |
| Sample volume       | 20 µL      |
| Lamp current        | 10 mA      |
| Slit width          | 0.5 nm     |
| Ar flow rate        | 0.3 L/min. |
| Mode of measurement | Peak Hight |

**Table S2. The used program for heating by normal gas**

| Step | Temperature (°C) | TIME (s) | Flow rate (L/min.) |
|------|------------------|----------|--------------------|
| 1.   | 90               | 5.0      | 0.3                |
| 2.   | 90               | 10.0     | 0.3                |
| 3.   | 120              | 5.0      | 0.3                |
| 4.   | 120              | 10.0     | 0.3                |

|     |      |     |     |
|-----|------|-----|-----|
| 5.  | 400  | 5.0 | 0.3 |
| 6.  | 400  | 1.0 | 0.3 |
| 7.  | 400  | 2.0 | 0.0 |
| 8.  | 2100 | 0.9 | 0.0 |
| 9.  | 2100 | 2.0 | 0.0 |
| 10. | 2100 | 2.0 | 0.3 |

**Table S3. Criteria and scoring scheme for the PPI.**

| No           | Criteria Scoring                                                                                                                                                                                                             | Options Score |
|--------------|------------------------------------------------------------------------------------------------------------------------------------------------------------------------------------------------------------------------------|---------------|
| 1            | Nature of Method Quantitative (10), Semiquantitative (6)<br>Qualitative (4)                                                                                                                                                  | 10            |
| 2            | Design of Experiment QbD optimization 10<br>Screening 5<br>No design 0                                                                                                                                                       | 10            |
| 3            | AI integration Advanced AI Integration (10)<br>Moderate AI Integration (7)<br>Basic AI Integration (3)<br>No AI Integration (0)                                                                                              | 10            |
| 4            | Validation Fully Validated (10), Partial (5), Not<br>validated (0)                                                                                                                                                           | 10            |
| 5            | Sensitivity Picogram (10), Nanogram (8), Microgram (5), >Microgram (2)                                                                                                                                                       | 10            |
| 6            | Availability of reagent Commercially available at a low cost, 10<br><br>Available at high cost or not commercially available, requires synthesis 5                                                                           | 10            |
| 7            | Availability of instrument and Cost of analysis per sample All instruments<br>are available at a low cost of 10<br>One special instrument needed with high/medium cost, 5<br>More instruments are needed at a<br>high-cost 0 | 10            |
| 8            | Maintenance frequency and<br>instrument lifetime<br>Long lifespans and minimal<br>maintenance 10 Moderate maintenance 5<br>Frequent repairs or replacement 0                                                                 | 10            |
| 9            | Time of Analysis<br>(Throughput) $\geq 25$<br>samples/h (10), $\leq 12$ samples/<br>h (5)                                                                                                                                    | 10            |
| 10           | Sample Reusability Yes (10), No (0)                                                                                                                                                                                          | 10            |
| <b>Total</b> |                                                                                                                                                                                                                              | <b>100</b>    |

**Table S4. EI index criteria**

| Options                                                                                      | Score |
|----------------------------------------------------------------------------------------------|-------|
| Sample preparation                                                                           | 100   |
| Instrumentation                                                                              | 100   |
| Reagent score                                                                                | 100   |
| Waste score                                                                                  | 100   |
| <b>EPPI Total Score = (EI Score <math>\times</math> 0.5) + (PPI <math>\times</math> 0.5)</b> |       |

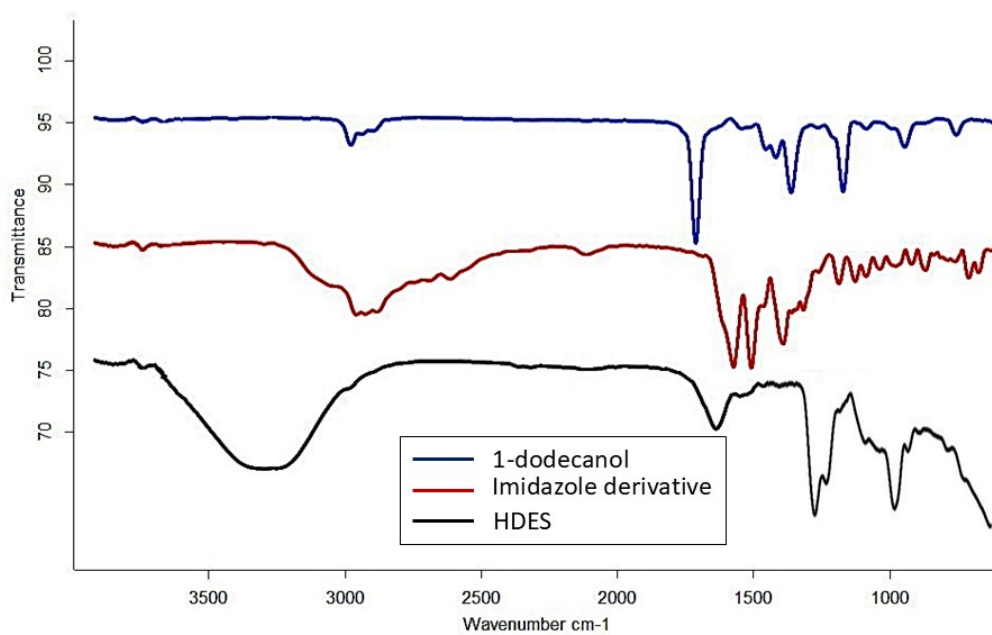

Figure S1: The FTIR spectra for HDES components

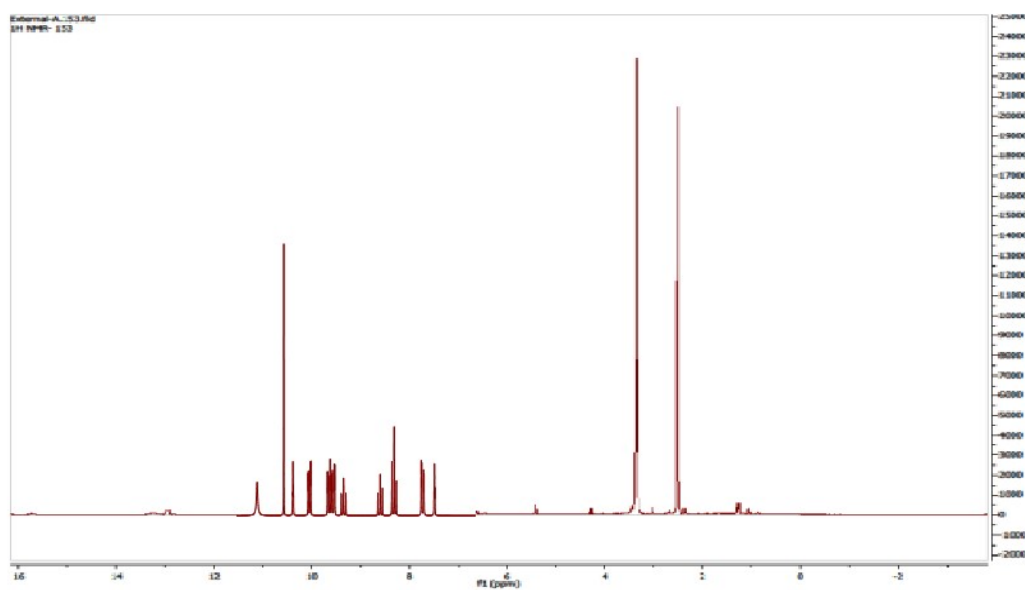

Figure S2: The <sup>1</sup>H NMR spectrum for a novel imidazole derivative, 2,2'-(1H-benzo[d]imidazole-1,2-diyl) diphenol (BIP)

**The calculated report from the EPPI software.**

# Environmental, Practicality, and Performance Index (EPPI)

Date: 24/20/25 / 1/17

| Component          | Score |
|--------------------|-------|
| Sample Preparation | 100.0 |
| Instrumentation    | 93.0  |
| Reagent            | 100.0 |
| Waste              | 75.0  |
| PPI                | 71.0  |
| Total              | 81.5  |

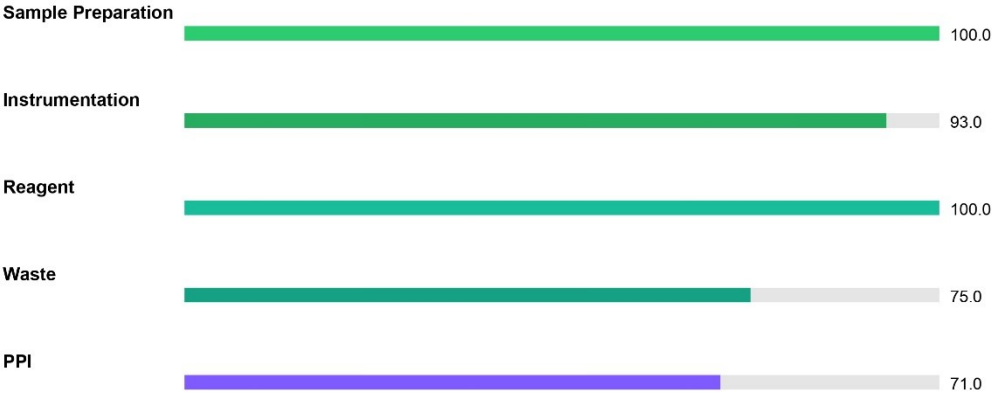

Component Distribution Chart

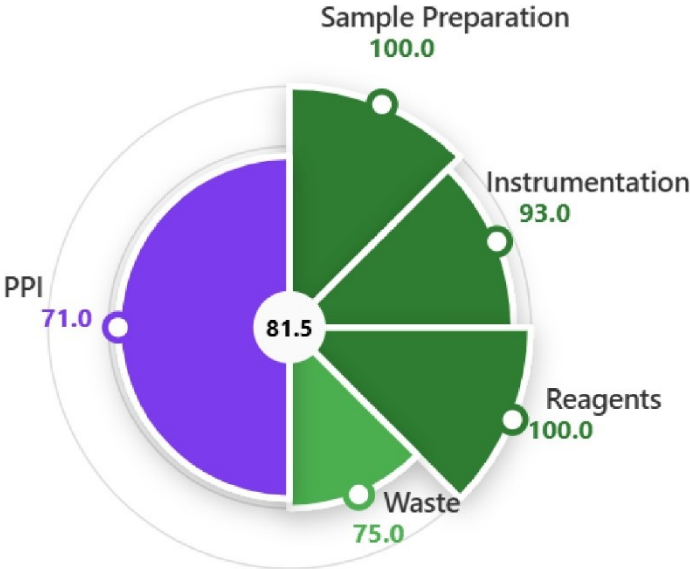

# Results Summary

## EI & PPI Indexes

### Environmental Impact Index

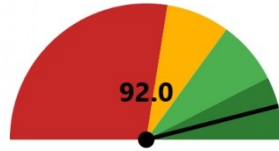

### Performance Practicality Index (PPI)

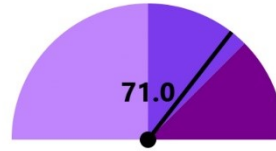

**TOTAL SCORE: 81.5 - Highly Recommended**

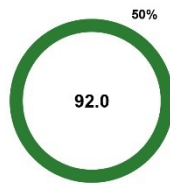

Environmental Index (EI)

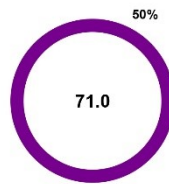

Performance Practicality Index (PPI)

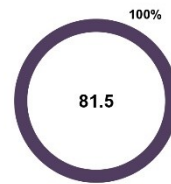

EPPI Score

### EPPI Components

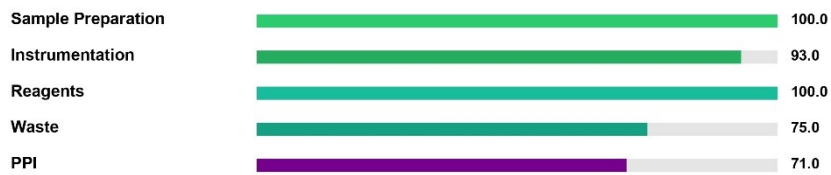

| Category                             | Score       | Weight      |
|--------------------------------------|-------------|-------------|
| Environmental Index (EI)             | 92.0        | 50%         |
| Performance Practicality Index (PPI) | 71.0        | 50%         |
| <b>TOTAL SCORE</b>                   | <b>81.5</b> | <b>100%</b> |
| Sample Preparation                   | 100.0       | -           |
| Instrumentation                      | 93.0        | -           |
| Reagents                             | 100.0       | -           |
| Waste                                | 75.0        | -           |

### Environmental Index (EI) Interpretation

- 85-100: Ideal green
- 70-84: Green Method
- 55-69: Acceptable green
- <55: Unsustainable Non-Green Method with Serious Impact

'□

### Performance Practicality Index (PPI) Interpretation

- 75-100: Excellent
- 50-74: Acceptable
- <50: Impractical

'□
